# Supplementary material
Source: MDPI journal article supplement (https://www.mdpi.com/2218-2004/11/10/135)
Supplement: s1 [file s1]

Archive with 1 entries (1 files):
- atoms-2590084-supplementary.pdf
